# Supplementary material for: The acute effect of match-play on hip range of motion and isometric strength in elite tennis players
Source: PeerJ. 2019 Nov 11;7:e7940. doi: 10.7717/peerj.7940 (PMC6855201; doi:10.7717/peerj.7940)
Supplement: Supplemental Information 1 [file peerj-07-7940-s001.xls]

## Sheet: HIP STRENGTH VALUES ABD-ADD
		PRE																																				POST
TENNIS PLAYERS	WEIGHT	ABD dom_1	ABD dom_1_rel	ABD dom_2	ABD dom_2_rel	ABD_DOM_MEAN	SD	ABD_DOM_MEAN_RELATIVE	ABD_dom_sd_rel	ABD no_dom_1	ABD no_dom_1_rel	ABD no_dom_2	ABD no_dom_1_rel	ABD_NO_DOM_MEAN	SD	ABD_NO_DOM_MEAN_RELATIVE	ABD_no_dom_sd_rel	ADD dom_1	ADD dom_1_rel	ADD dom_2	ADD dom_2_rel	ADD_dom_MEAN	SD	ADD_DOM_MEAN_RELATIVE	ADD_dom_sd_rel	ADD no_dom 1	ADD no_dom_1_rel	ADD_NO_dom 2	ADD NO_dom_2_rel	ADD_NO_DOM_MEAN	SD	ADD_NO_ DOM_MEAN_RELATIVE	ADD_no_dom_sd_rel	ratio_ADD_ABD_DOM_ABS	ratio_ADD_ABD_NO_DOM_ABSOLUTE	RATIO_RELATIVE_ADD/ABD_DOM	RATIO_RELATIVE_ADD/ABD_NO_DOM	TENNIS PLAYER	ABD dom_1	ABD dom_1_rel	ABD dom_2	ABD dom_2_rel	ABD_DOM_MEAN	SD	ABD_DOM_MEAN_RELATIVE	ABD_dom_sd_rel	ABD no_dom_1	ABD no_dom_1_rel	ABD no_dom_2
P1	65	163	2.50769	168	2.58462	165.5	3.53553	2.54615	0.0543928	128.4	1.97538	131.5	2.02308	129.95	2.19203	1.99923	0.0337236	158	2.43077	161.3	2.48154	159.65	2.33345	2.45615	0.0358993	133.9	2.06	136.9	2.10615	135.4	2.12132	2.08308	2.08308	0.964653	1.04194	0.964653	1.04194	P1	125	1.92308	130.1	2.00154	127.55	3.60624	1.96231	0.0554807	123.9	1.90615	128.8
P2	75	148.7	1.98267	150.1	2.00133	149.4	0.989949	1.992	0.0131993	124.9	1.66533	126.7	1.68933	125.8	1.27279	1.67733	0.0169706	151.8	2.024	154.7	2.06267	153.25	2.05061	2.04333	0.0273415	128.1	1.708	133.7	1.78267	130.9	3.9598	1.74533	1.74533	1.02577	1.04054	1.02577	1.04054	P2	120.6	1.608	126.4	1.68533	123.5	4.10122	1.64667	0.0546829	123.7	1.64933	129
P3	85	150.4	1.76941	152.3	1.79176	151.35	1.3435	1.78059	0.0158059	155.7	1.83176	157.9	1.85765	156.8	1.55563	1.84471	0.0183016	193.7	2.27882	196.8	2.31529	195.25	2.19203	2.29706	0.0257886	166.5	1.95882	171.3	2.01529	168.9	3.39411	1.98706	1.98706	1.29006	1.07717	1.29006	1.07717	P3	175.1	2.06	182.1	2.14235	178.6	4.94975	2.10118	0.0582323	193.6	2.27765	196.3
P4	74	150.1	2.02838	157.9	2.13378	154	5.51543	2.08108	0.0745329	166.7	2.2527	173.2	2.34054	169.95	4.59619	2.29662	0.0621107	187.2	2.52973	195.2	2.63784	191.2	5.65685	2.58378	0.076444	188.6	2.54865	193.2	2.61081	190.9	3.25269	2.57973	2.57973	1.24156	1.12327	1.24156	1.12327	P4	136.3	1.84189	140.4	1.8973	138.35	2.89914	1.86959	0.0391775	67.6	0.913514	73.2
P5	96	130.6	1.36042	138.8	1.44583	134.7	5.79828	1.40313	0.0603987	85.2	0.8875	94.6	0.985417	89.9	6.6468	0.936458	0.0692375	130.4	1.35833	139.8	1.45625	135.1	6.6468	1.40729	0.0692375	147.7	1.53854	154.6	1.61042	151.15	4.87904	1.57448	1.57448	1.00297	1.68131	1.00297	1.68131	P5	93.4	0.972917	98.7	1.02812	96.05	3.74767	1.00052	0.0390382	77.3	0.805208	82.3
P6	62.5	147	2.352	151.4	2.4224	149.2	3.11127	2.3872	0.0497803	159.3	2.5488	164.3	2.6288	161.8	3.53553	2.5888	0.0565685	166.8	2.6688	172.1	2.7536	169.45	3.74767	2.7112	0.0599627	170.8	2.7328	176.5	2.824	173.65	4.03051	2.7784	2.7784	1.13572	1.07324	1.13572	1.07324	P6	130.4	2.0864	136.4	2.1824	133.4	4.24264	2.1344	0.0678823	114.4	1.8304	119.1
P7	80	184.1	2.30125	195.6	2.445	189.85	8.13173	2.37312	0.101647	157.9	1.97375	168.2	2.1025	163.05	7.2832	2.03812	0.09104	164.5	2.05625	175.6	2.195	170.05	7.84889	2.12563	0.0981111	169.3	2.11625	178.1	2.22625	173.7	6.22254	2.17125	2.17125	0.895707	1.06532	0.895707	1.06532	P7	125	1.5625	131.2	1.64	128.1	4.38406	1.60125	0.0548008	101.4	1.2675	106.4
P8	70.2	150.1	2.13818	156.9	2.23504	153.5	4.80833	2.18661	0.0684947	134.7	1.9188	140.2	1.99715	137.45	3.88909	1.95798	0.0554001	183.6	2.61538	189.1	2.69373	186.35	3.88909	2.65456	0.0554001	166.5	2.37179	172.1	2.45157	169.3	3.9598	2.41168	2.41168	1.21401	1.23172	1.21401	1.23172	P8	124.2	1.76923	129.7	1.84758	126.95	3.88909	1.8084	0.0554001	119.5	1.70228	125.3
P9	70	157	2.24286	162.4	2.32	159.7	3.81838	2.28143	0.0545482	154	2.2	159.1	2.27286	156.55	3.60624	2.23643	0.0515178	179.9	2.57	184.3	2.63286	182.1	3.11127	2.60143	0.0444467	179.9	2.57	185	2.64286	182.45	3.60624	2.60643	2.60643	1.14026	1.16544	1.14026	1.16544	P9	141.6	2.02286	145.7	2.08143	143.65	2.89914	2.05214	0.0414163	117.2	1.67429	122.3
P10	92	172	1.86957	175.4	1.90652	173.7	2.40416	1.88804	0.0261322	160.4	1.74348	164.2	1.78478	162.3	2.68701	1.76413	0.0292066	155.3	1.68804	159.4	1.73261	157.35	2.89914	1.71033	0.0315124	153.2	1.66522	158.1	1.71848	155.65	3.46482	1.69185	1.69185	0.905872	0.959026	0.905872	0.959026	P10	126.7	1.37717	132.2	1.43696	129.45	3.88909	1.40707	0.0422727	164	1.78261	171.2
P11	67	167.4	2.49851	172.4	2.57313	169.9	3.53553	2.53582	0.0527692	142.5	2.12687	146.7	2.18955	144.6	2.96985	2.15821	0.0443261	193.4	2.88657	198.8	2.96716	196.1	3.81838	2.92687	0.0569907	197.4	2.94627	201.3	3.00448	199.35	2.75772	2.97537	2.97537	1.15421	1.37863	1.15421	1.37863	P11	188.6	2.81493	193.2	2.88358	190.9	3.25269	2.84925	0.0485476	199.3	2.97463	204.3
P12	65	136.1	2.09385	142.5	2.19231	139.3	4.52548	2.14308	0.0696228	129.8	1.99692	133.4	2.05231	131.6	2.54558	2.02462	0.0391628	96.1	1.47846	105.7	1.62615	100.9	6.78823	1.55231	0.104434	96.6	1.48615	106	1.63077	101.3	6.6468	1.55846	1.55846	0.724336	0.769757	0.724336	0.769757	P12	125.9	1.93692	130.2	2.00308	128.05	3.04056	1.97	0.0467778	139.1	2.14	144.2
P13	80	166.9	2.08625	176.4	2.205	171.65	6.71751	2.14562	0.0839689	153.4	1.9175	165.3	2.06625	159.35	8.41457	1.99188	0.105182	211.3	2.64125	224.5	2.80625	217.9	9.33381	2.72375	0.116673	167.8	2.0975	180.3	2.25375	174.05	8.83883	2.17563	2.17563	1.26944	1.09225	1.26944	1.09225	P13	130.5	1.63125	135.4	1.6925	132.95	3.46482	1.66187	0.0433103	122	1.525	127.1
P14	66	156.9	2.37727	157.8	2.39091	157.35	0.636396	2.38409	0.00964237	168.2	2.54848	170.1	2.57727	169.15	1.3435	2.56288	0.0203561	176.8	2.67879	178.9	2.71061	177.85	1.48492	2.6947	0.0224989	158.9	2.40758	160.3	2.42879	159.6	0.989949	2.41818	2.41818	1.13028	0.943541	1.13028	0.943541	P14	144.2	2.18485	149.4	2.26364	146.8	3.67696	2.22424	0.0557114	127.2	1.92727	132.2
P15	67.2	160	2.38095	165.3	2.45982	162.65	3.74767	2.42039	0.0557688	146.5	2.18006	151.2	2.25	148.85	3.3234	2.21503	0.0494554	171.3	2.54911	176.3	2.62351	173.8	3.53553	2.58631	0.0526121	174.5	2.59673	180.1	2.68006	177.3	3.9598	2.63839	2.63839	1.06855	1.19113	1.06855	1.19113	P15	162.2	2.41369	167.3	2.48958	164.75	3.60624	2.45164	0.0536644	144.8	2.15476	129.1
P16	65	133.5	2.05385	154.3	2.37385	143.9	14.7078	2.21385	0.226274	146.8	2.25846	157.8	2.42769	152.3	7.77817	2.34308	0.119664	195.2	3.00308	205.6	3.16308	200.4	7.35391	3.08308	0.113137	150.7	2.31846	155.4	2.39077	153.05	3.3234	2.35462	2.35462	1.39263	1.00492	1.39263	1.00492	P16	172.3	2.65077	179.4	2.76	175.85	5.02046	2.70538	0.0772378	134.8	2.07385	139.2
P17	64.1	128.3	2.00156	143.6	2.24025	135.95	10.8187	2.1209	0.168779	126.3	1.97036	141.2	2.20281	133.75	10.5359	2.08658	0.164366	123.6	1.92824	140.3	2.18877	131.95	11.8087	2.0585	0.184223	116.7	1.82059	130	2.02808	123.35	9.40452	1.92434	1.92434	0.970577	0.922243	0.970577	0.922243	P17	108	1.68487	113.4	1.76911	110.7	3.81838	1.72699	0.0595691	112.6	1.75663	117.2
P18	65.1	115.6	1.77573	120.2	1.84639	117.9	3.25269	1.81106	0.0499645	105.4	1.61905	110.3	1.69432	107.85	3.46482	1.65668	0.0532231	236.1	3.62673	239.6	3.68049	237.85	2.47487	3.65361	0.0380165	226.1	3.47312	230.1	3.53456	228.1	2.82843	3.50384	3.50384	2.01739	2.11497	2.01739	2.11497	P18	118.1	1.81413	121.1	1.86022	119.6	2.12132	1.83717	0.0325856	101.7	1.56221	105.9
P19	74	115	1.55405	121.8	1.64595	118.4	4.80833	1.6	0.0649774	107.7	1.45541	113.4	1.53243	110.55	4.03051	1.49392	0.0544663	105.5	1.42568	111.1	1.50135	108.3	3.9598	1.46351	0.0535108	114.7	1.55	120.4	1.62703	117.55	4.03051	1.58851	1.58851	0.914696	1.06332	0.914696	1.06332	P19	112.2	1.51622	117.3	1.58514	114.75	3.60624	1.55068	0.048733	110.5	1.49324	115.6
P20	71	123.8	1.74366	125.3	1.76479	124.55	1.06066	1.75423	0.0149389	155.4	2.18873	160.3	2.25775	157.85	3.46482	2.22324	0.0488003	165	2.32394	170.3	2.39859	167.65	3.74767	2.36127	0.052784	161.2	2.27042	156.7	2.20704	158.95	3.18198	2.23873	2.23873	1.34605	1.00697	1.34605	1.00697	P20	131.7	1.85493	135.6	1.90986	133.65	2.75772	1.88239	0.0388411	112.4	1.5831	117.5
P21	64	173.7	2.71406	176.7	2.76094	175.2	2.12132	2.7375	0.0331456	163.1	2.54844	167.8	2.62188	165.45	3.3234	2.58516	0.0519282	160.8	2.5125	164.8	2.575	162.8	2.82843	2.54375	0.0441942	152.4	2.38125	156.8	2.45	154.6	3.11127	2.41563	2.41563	0.929224	0.934421	0.929224	0.934421	P21	185.1	2.89219	191.2	2.9875	188.15	4.31335	2.93984	0.0673961	186	2.90625	191.2
P22	66	119.7	1.81364	121.3	1.83788	120.5	1.13137	1.82576	0.017142	116.1	1.75909	120.3	1.82273	118.2	2.96985	1.79091	0.0449977	112.3	1.70152	116.8	1.7697	114.55	3.18198	1.73561	0.0482118	109.8	1.66364	142.5	2.15909	126.15	23.1224	1.91136	1.91136	0.950622	1.06726	0.950622	1.06726	P22	149.2	2.26061	154.3	2.33788	151.75	3.60624	2.29924	0.0546401	95.3	1.44394	101.2
P23	72.2	122.4	1.69529	125.7	1.741	124.05	2.33345	1.71814	0.0323193	118.7	1.64404	122.4	1.69529	120.55	2.6163	1.66967	0.0362368	123.5	1.71053	127.9	1.77147	125.7	3.11127	1.741	0.0430924	144.2	1.99723	148.9	2.06233	146.55	3.3234	2.02978	2.02978	1.0133	1.21568	1.0133	1.21568	P23	104.8	1.45152	109.9	1.52216	107.35	3.60624	1.48684	0.049948	117.1	1.62188	122.3
P24	75.5	174	2.30464	181	2.39735	177.5	4.94975	2.35099	0.0655596	172.8	2.28874	179.8	2.38146	176.3	4.94975	2.3351	0.0655596	216.7	2.8702	221.4	2.93245	219.05	3.3234	2.90132	0.0440186	232.3	3.07682	237.5	3.1457	234.9	3.67696	3.11126	3.11126	1.23408	1.33239	1.23408	1.33239	P24	240.9	3.19073	245	3.24503	242.95	2.89914	3.21788	0.0383992	249.5	3.30464	254.2
P25	65.1	123.7	1.90015	125.6	1.92934	124.65	1.3435	1.91475	0.0206375	113.4	1.74194	118.3	1.8172	115.85	3.46482	1.77957	0.0532231	134.7	2.06912	139.9	2.149	137.3	3.67696	2.10906	0.0564816	165.7	2.54531	169.8	2.60829	167.75	2.89914	2.5768	2.5768	1.10148	1.44799	1.10148	1.44799	P25	84.8	1.30261	89.9	1.38095	87.35	3.60624	1.34178	0.0553955	71.4	1.09677	76.4
P26	75.7	158.4	2.09247	162.3	2.14399	160.35	2.75772	2.11823	0.0364295	164.8	2.17701	166.7	2.20211	165.75	1.3435	2.18956	0.0177477	168.9	2.23118	173.1	2.28666	171	2.96985	2.25892	0.0392318	178.2	2.35403	182.1	2.40555	180.15	2.75772	2.37979	2.37979	1.06642	1.08688	1.06642	1.08688	P26	117.5	1.55218	122.3	1.61559	119.9	3.39411	1.58388	0.0448364	106.8	1.41083	111.1
MEAN AM		147.246		153.115		150.181	4.15017	2.10438	0.0480767	138.682		144.448		141.565	4.07701			160.125	#DIV/0!	166.574		163.349	#DIV/0!	2.34555		156.492		163.441		159.966	4.9135	2.28577		1.11923	1.15505	1.11923	1.15505	MEDIA PM	133.945	#DIV/0!	139.178	#DIV/0!	140.04	#DIV/0!	1.97356	#DIV/0!	122.48	#DIV/0!	127.003
																								0.542008								0.490122				0.242219	0.270408								0.526621
								2.10438	0.0480767							2.01715	0.1					112.1		SD POOLED								EFFECT SIZE
								0.323074														91.8		0.58026	0.0613175							-1.99031	2.28577
																								EFFECT SIZE									0.490122
							112.1	150.2	746	100														-1.21948	2.35																				1.32	0.05
								94
																1.35	0.06																									91.8	94
																																											0.97
[truncated: 25 more columns]

## Sheet: HIP FLEXIBILITY IR-ER 
	PRE																	POST
TENNIS PLAYER	IR DOM 1	IR DOM 2	IR_DOM_MEAN	SD	IR NO-DOM 1	IR NO-DOM 2	IR_NO_DOM_MEAN	SD	ER DOM 1	ER DOM 2	ER_DOM_MEAN	SD	ER NO-DOM 1	ER NO-DOM 2	ER_NO_DOM_MEAN	SD	TENNIS PLAYER	IR DOM 1	IR DOM 2	IR_DOM_MEAN	SD	IR NO-DOM 1	IR NO-DOM 2	IR_NO_DOM_MEAN	SD	ER DOM 1	ER DOM 2	ER_MEAN	SD	ER NO-DOM 1	ER NO-DOM 2	ER_NO_DOM_MEAN	SD
P1	41	42	41.5	0.707107	28	28.5	28.25	0.353553	46	46	46	0	54	54	54	0	P1	36	36	36	0	30	31	30.5	0.707107	70	70	70	0	60	60	60	0
P2	22	22.5	22.25	0.353553	28	28	28	0	30	31	30.5	0.707107	37	37	37	0	P2	49	49	49	0	46	46	46	0	38	38	38	0	46	46	46	0
P3	30	30	30	0	24	25	24.5	0.707107	48	48	48	0	46	46	46	0	P3	28	29	28.5	0.707107	30	31	30.5	0.707107	52	52	52	0	50	50	50	0
P4	36	36	36	0	36	37	36.5	0.707107	39	39	39	0	30	31	30.5	0.707107	P4	30	31	30.5	0.707107	42	42	42	0	50	50	50	0	36	36	36	0
P5	52	53	52.5	0.707107	60	60	60	0	40	40	40	0	18	20	19	1.41421	P5	64	64	64	0	60	60	60	0	44	44	44	0	40	40	40	0
P6	40	41	40.5	0.707107	35	35	35	0	33	34	33.5	0.707107	34	34	34	0	P6	44	44	44	0	40	40	40	0	42	43	42.5	0.707107	40	40	40	0
P7	26	26	26	0	30	31	30.5	0.707107	40	40	40	0	40	40	40	0	P7	14	15	14.5	0.707107	24	25	24.5	0.707107	40	41	40.5	0.707107	36	37	36.5	0.707107
P8	30	31	30.5	0.707107	29	30	29.5	0.707107	22	23	22.5	0.707107	40	40	40	0	P8	30	30	30	0	28	28	28	0	39	39	39	0	42	42	42	0
P9	33	33	33	0	31	30	30.5	0.707107	44	44	44	0	24	25	24.5	0.707107	P9	42	42	42	0	38	38	38	0	50	50	50	0	48	48	48	0
P10	32	33	32.5	0.707107	28	29	28.5	0.707107	50	51	50.5	0.707107	56	56	56	0	P10	36	37	36.5	0.707107	20	21	20.5	0.707107	50	50	50	0	59	59	59	0
P11	39	40	39.5	0.707107	45	45	45	0	40	41	40.5	0.707107	54	54	54	0	P11	40	40	40	0	36	38	37	1.41421	40	41	40.5	0.707107	50	50	50	0
P12	50	50	50	0	51	51	51	0	60	60	60	0	60	60	60	0	P12	30	31	30.5	0.707107	37	37	37	0	60	60	60	0	61	61	61	0
P13	30	30	30	0	30	32	31	1.41421	60	65	62.5	3.53553	50	53	51.5	2.12132	P13	33	35	34	1.41421	28	29	28.5	0.707107	48	49	48.5	0.707107	62	62	62	0
P14	30	35	32.5	3.53553	20	25	22.5	3.53553	60	60	60	0	60	65	62.5	3.53553	P14	33	33	33	0	21	25	23	2.82843	42	43	42.5	0.707107	52	53	52.5	0.707107
P15	61	62	61.5	0.707107	52	51	51.5	0.707107	50	50	50	0	62	63	62.5	0.707107	P15	55	59	57	2.82843	50	51	50.5	0.707107	40	39	39.5	0.707107	60	50	55	7.07107
P16	40	45	42.5	3.53553	40	38	39	1.41421	60	62	61	1.41421	55	60	57.5	3.53553	P16	30	30	30	0	30	30	30	0	41	41	41	0	49	45	47	2.82843
P17	45	43	44	1.41421	50	45	47.5	3.53553	50	51	50.5	0.707107	60	70	65	7.07107	P17	43	45	44	1.41421	41	41	41	0	35	33	34	1.41421	43	47	45	2.82843
P18	42	42	42	0	37	37	37	0	33	34	33.5	0.707107	39	39	39	0	P18	36	36	36	0	35	35	35	0	48	48	48	0	45	45	45	0
P19	36	36	36	0	36	36	36	0	32	33	32.5	0.707107	22	24	23	1.41421	P19	26	26	26	0	19	30	24.5	7.77817	36	36	36	0	40	40	40	0
P20	26	37	31.5	7.77817	24	25	24.5	0.707107	30	31	30.5	0.707107	28	29	28.5	0.707107	P20	27	27	27	0	20	21	20.5	0.707107	39	39	39	0	55	55	55	0
P21	32	33	32.5	0.707107	31	32	31.5	0.707107	50	50	50	0	30	32	31	1.41421	P21	30	30	30	0	29	29	29	0	49	49	49	0	50	50	50	0
P22	16	17	16.5	0.707107	18	19	18.5	0.707107	29	30	29.5	0.707107	47	47	47	0	P22	27	27	27	0	19	19	19	0	39	39	39	0	54	54	54	0
P23	31	31	31	0	30	30	30	0	25	26	25.5	0.707107	28	28	28	0	P23	36	36	36	0	20	21	20.5	0.707107	25	26	25.5	0.707107	33	33	33	0
P24	30	30	30	0	28	29	28.5	0.707107	42	42	42	0	30	31	30.5	0.707107	P24	31	31	31	0	27	28	27.5	0.707107	38	38	38	0	36	36	36	0
P25	40	40	40	0	40	40	40	0	30	30	30	0	34	34	34	0	P25	32	33	32.5	0.707107	31	32	31.5	0.707107	32	33	32.5	0.707107	31	31	31	0
P26	42	42	42	0	41	41	41	0	58	58	58	0	54	55	54.5	0.707107	P26	54	54	54	0	52	52	52	0	37	37	37	0	33	33	33	0
MEAN AM	35.8462	36.9423	36.3942	0.775098	34.6923	34.9808	34.8365	0.203973	42.3462	43.0385	42.6923	0.489535	42	43.3462	42.6731	0.951875	MEDIA AM	36	36.5385	36.2692	0.38075	32.8077	33.8462	33.3269	0.734303	43.2308	43.3846	43.3077	0.108786	46.5769	46.2692	46.4231	0.217571
